# Supplementary material for: Adipogenicity-induced human mesenchymal stem cells treated with hemp seed oil stimulate brown-like adipocytes and decrease adipokine levels through the activation of cannabinoid receptor 2 (CB2)
Source: Springer Nature journal article supplement (doi:10.1186/s42238-025-00343-2), 2025-11-19

**Supplementary file: Uncropped Gels and Blots image(s)**

1. CB1 - Entire gel and Blot

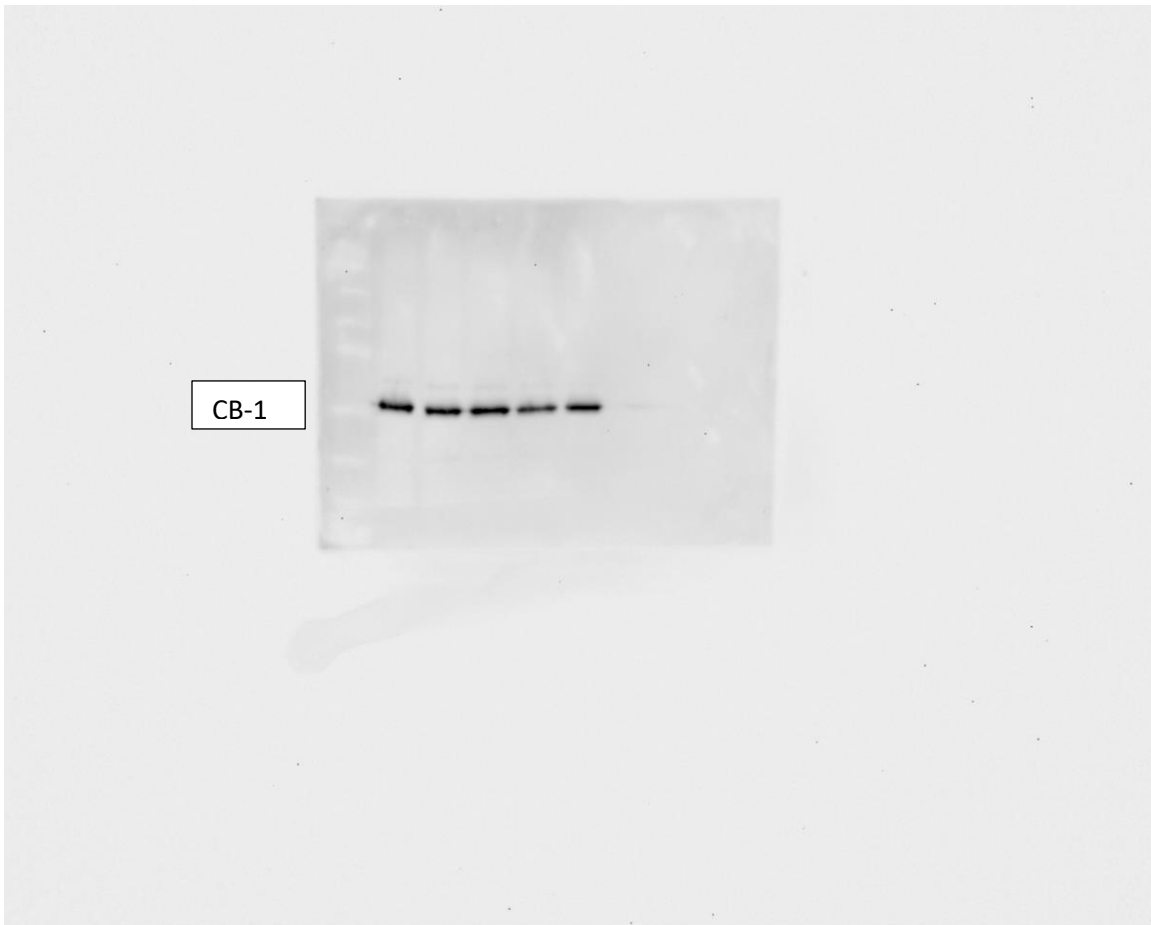

2. CB-2 lower kDa- Entire gel and Blot

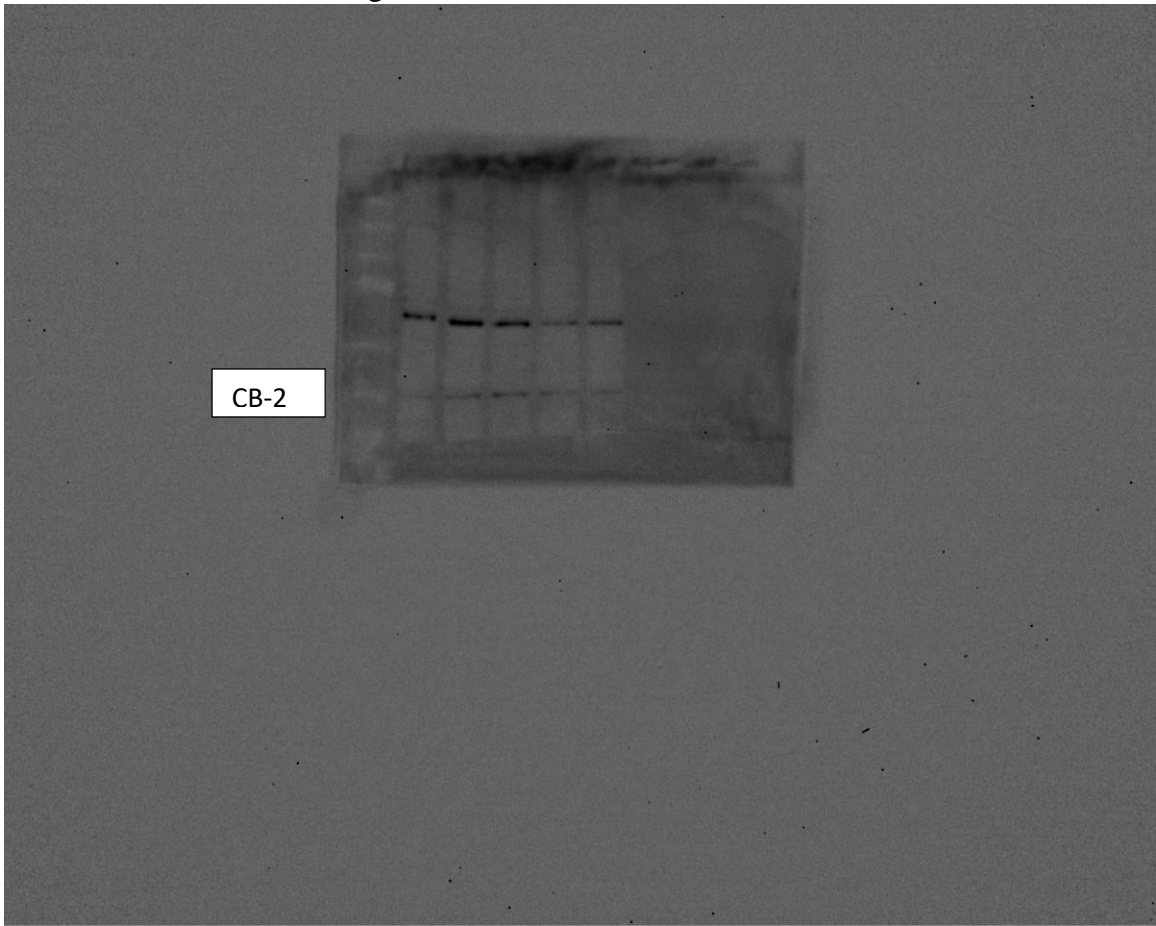

3. TRPV1 - Entire gel and Blot

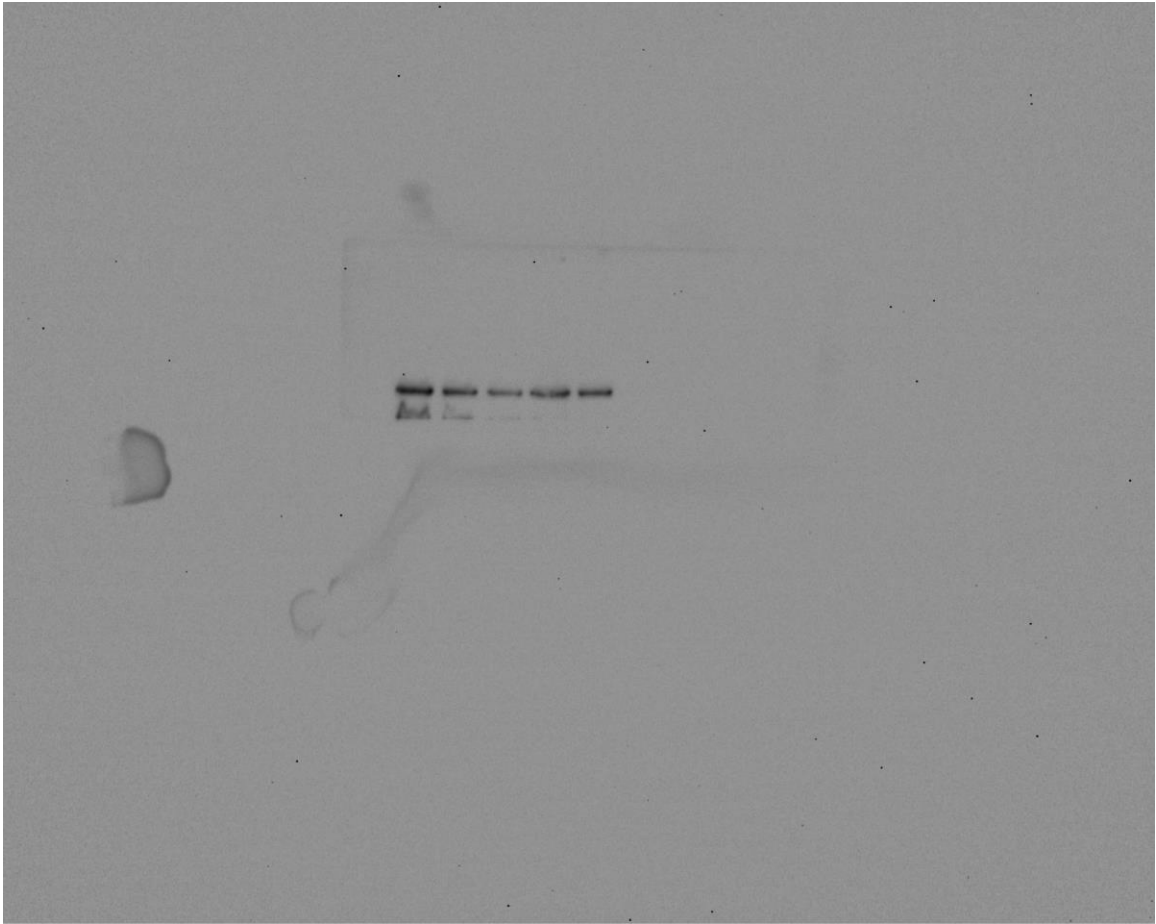

4. GPCR55 - Entire gel and Blot

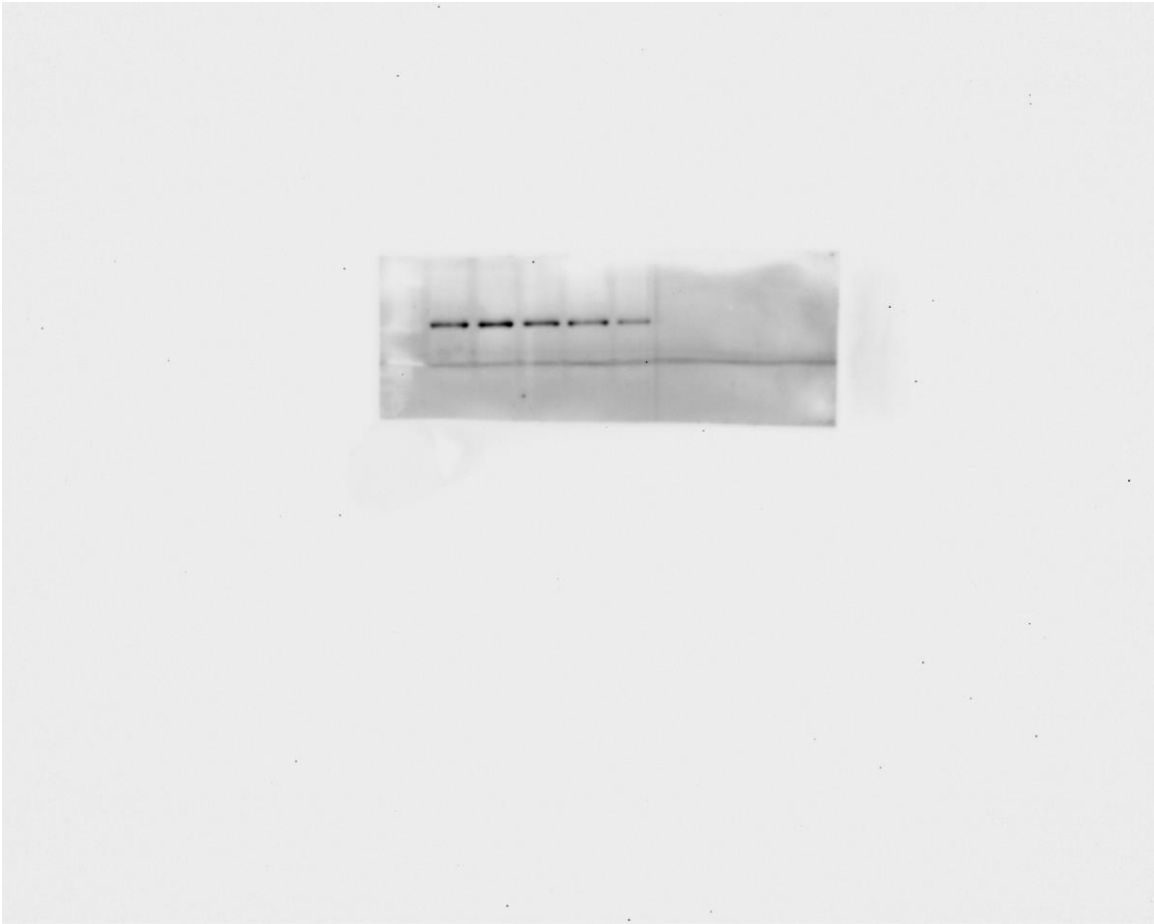

5. GAPDH- Entire gel and Blot

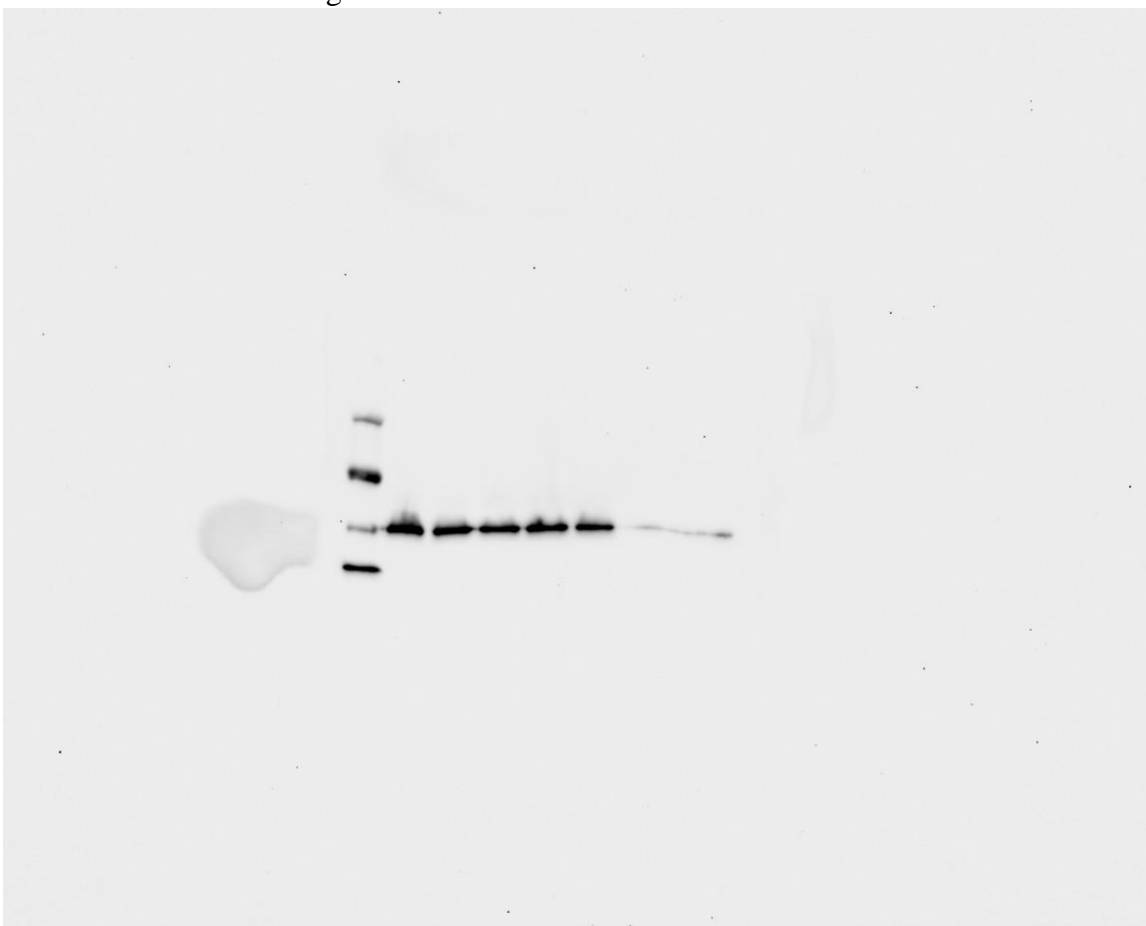

Supplement: MOESM1 [file 42238_2025_343_MOESM1_ESM-1.pdf]
